# Supplementary material for: UCNPs@Zn0.5Cd0.5S Core-Shell and Yolk-Shell Nanostructures: Selective Synthesis, Characterization, and Near-Infrared-Mediated Photocatalytic Reduction of Cr(VI)
Source: Hindawi journal article supplement (doi:10.1155/2018/1293847), 2018-09-13
Supplement: f1 [file 1293847.f1.doc]

**Supporting information**

UCNPs@Zn0.5Cd0.5S core-shell and yolk-shell nanostructures: Selective synthesis, characterization and near-infrared mediated photocatalytic reduction of Cr(VI)

Wan-Ni Wang,1 Wang Dong,1 Chen-Xi Huang,1 Bo Liu,1 Sheng Cheng*,2 Haisheng Qian *,1,3

*1School of Food and Bioengineering, Hefei University of Technology, Hefei, 230009, P. R. China.*

*2Instrumental Analysis Center, Hefei University of Technology, Hefei, 230009, P. R. China.*

*3Biomedical and Environmental Interdisciplinary Research Centre, Hefei, 230010, P. R. China.*

**Hydroxyl radical (•OH) detection.** Terephthalic acid (TA) was used as a standard reagent to investigate the production of •OH. Typically, 0.8307 g TA, 0.4 g NaOH and 5 mg of as-prepared UCNPs@Zn0.5Cd0.5S YSN were added into 32 mL double distilled water and dissolved to form clear solution. The solution was irradiated using a Xe lamp with an UV-Vis filter for 60 min under magnetic stirring. After removing the yolk-shell nanoparticle by centrifugation, the solution was determined on an Edinburgh FLS980 fluorescence spectrometer.

**Characterization.** The surface morphologies of these products were investigated using field-emission scanning electron microscopy (FESEM) with a SU8020 (Hitachi, Japan), transmission electron microscopy (TEM) images, high-resolution transmission electron microscopy (HRTEM), and energy-dispersive X-ray (EDX) operated with JEM-2100F (JEOL, Japan), respectively. The X-ray diffraction (XRD) patterns of the as-prepared samples were obtained by an X’Pert PRO MPD X-ray diffractometer (PANalytical B.V., Holland) with use of graphite monochromated Cu Kα radiation. The UV-Vis absorption spectra of the as-prepared samples were obtained using a Hitachi U-5100 spectrophotometer (Hitachi High-Technology Corporation) and all the samples were dispersed in double distilled water. X-ray photoelectron spectra (XPS) were operated on an ESCALAB250Xi X-ray photoelectron spectrometer (Thermo Scientific, American). Upconversion fluorescent spectra were measured on an Edinburgh FLS980 fluorescence spectrometer using an external CW laser of 980 nm.


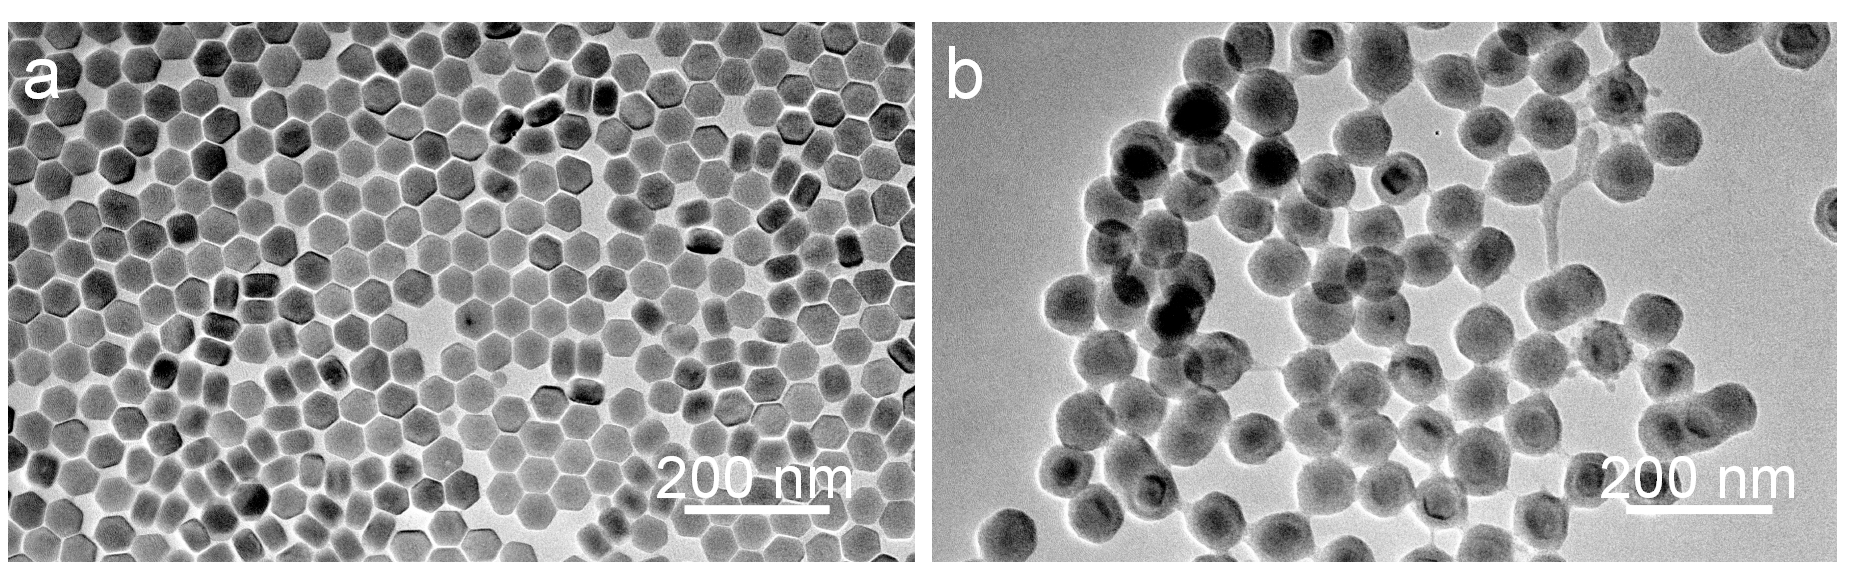


**Figure S1.** (a)Transmission electron microscopy (TEM) image of NaYF4:Yb/Tm@NaYF4 nanoparticles. (b) ransmission electron microscopy (TEM) image of UCNPs@AA-Zn[(OH)4]2- nanoparticles.


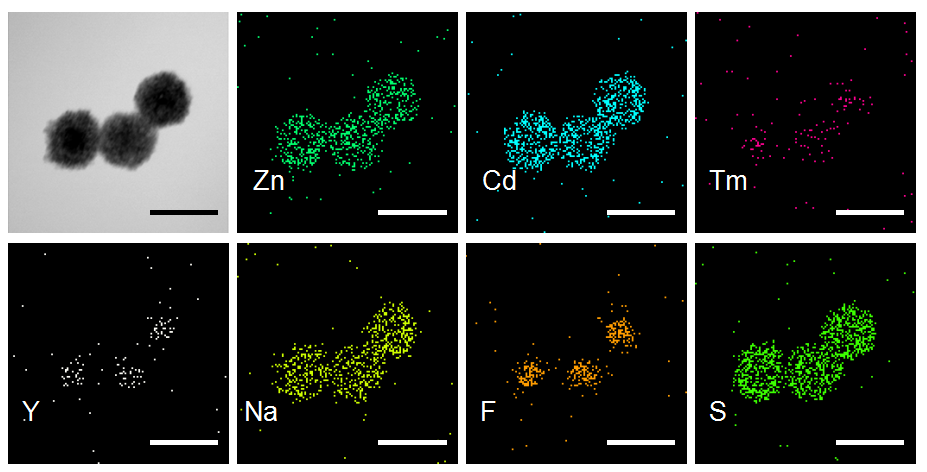


**Figure S2.** STEM image and elemental imaging of UCNPs@Zn0.5Cd0.5S CSN.


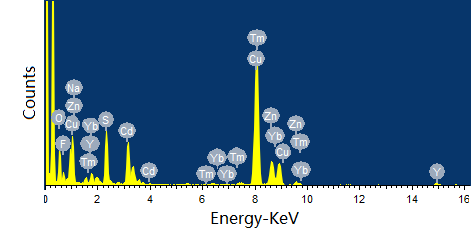


| Element | Weight % | Atomic % |
| --- | --- | --- |
| F | 3.07 | 8.79 |
| Na | 4.09 | 9.65 |
| S | 23.48 | 39.76 |
| Zn | 25.08 | 20.83 |
| Y | 3.00 | 1.83 |
| Cd | 36.40 | 17.59 |
| Tm | 2.05 | 0.66 |
| Yb | 2.82 | 0.89 |
| Totals 100 | | |

**Figure S3.** (a) Energy dispersive X-ray spectra of the as-prepared product shown in Figure 1; (b) element composition of the as-prepared UCNPs@Zn0.5Cd0.5S YSN from EDX analyses.

**Figure S4.** X-ray photoelectron spectra of the as-prepared yolk-shell like nanoparticles of UCNPs@Zn0.5Cd0.5S YSN: (a) a general survey; (b) Zn 2p; (c) Cd 3d; (d) S 2p; (e) Na 1s; (f) Y 3d; (g)Yb 4d; (h)Tm 4d, respectively.

**Figure S5.** Fourier transform infrared (FT-IR) spectrum of the as-prepared UCNPs@Zn0.5Cd0.5S CSN and UCNPs@Zn0.5Cd0.5S YSN, respectively.

**Figure S6**. (a) Fluorescence spectra of 2-hydroxy-terephthalic acid (TAOH) with the addition of UCNPs@Zn0.5Cd0.5S YSN excited by a 980 nm CW laser. (b) Photocatalytic reduction of Cr(VI) in the presence of UCNPs@Zn0.5Cd0.5S YSN at given irradiation times under irradiation of a 1500 mW Xe lamp with a UV-Vis filter.
